# Supplementary material for: Evaluation of the Search and Rescue Leeway model into the Tyrrhenian sea: a new point of view
Source: Copernicus journal article supplement (doi:10.5194/nhess-2016-109), 2016-04-11
Supplement: Supplementary file [file nhess-2016-109-AC2-supplement.zip]

## **Answer to referee #2**

### **Minor remarks**

1. To include the domain of the ocean model. **Done**
2. To deepen the discussion about the results obtained by means of the standard statistical approach. **Done**
3. Clarification about TSCRM forcings. **Done**
4. To change lines colours. **Done**

Typos (Title and inside the test). **Done**
